# Supplementary material
Source: PubMed Central journal article supplement (PMC4510181)
Supplement: AEM.01221-15_zam999116451so1.pdf [file AEM.01221-15_zam999116451so1.pdf]

**TABLE S1** Bacterial strains and plasmid used in this study

| Strain                           | Relevant Characteristics                                                                                              | Source     |
|----------------------------------|-----------------------------------------------------------------------------------------------------------------------|------------|
| <i>S. gordonii</i> strains:      |                                                                                                                       |            |
| CH1                              | Parental strain Challis, sequenced                                                                                    | (1)        |
| KS1                              | Kan <sup>r</sup> derivative of CH1                                                                                    | (2)        |
| KS1 $\Omega$ <i>abpA</i>         | <i>abpA</i> -deficient derivative of KS1 made by inserting <i>tet</i> (M) encoding Tc <sup>r</sup> ; Kan <sup>r</sup> | (2)        |
| KS1 $\Omega$ <i>abpA</i> /pFS001 | KS1 $\Omega$ <i>abpA</i> transformed with pFS001; Kan <sup>r</sup> , Tc <sup>r</sup> , Em <sup>r</sup> ,              | This study |
| Plasmids:                        |                                                                                                                       |            |
| pVA749                           | Plasmid for complementation, Em <sup>r</sup>                                                                          | (3)        |
| pFS001                           | pVA749 carrying <i>abpA</i> and its promoter 285 bp upstream from the translational start site                        | This study |

\* r, resistance; Kan, kanamycin; Tc, tetracycline; Em, erythromycin.

1. **Tardif G, Sulavik MC, Jones GW, Clewell DB.** 1989. Spontaneous switching of the sucrose-promoted colony phenotype in *Streptococcus sanguis*. *Infect Immun* **57**:3945-3948.
2. **Tanzer JM, Thompson A, Sharma K, Vickerman MM, Haase EM, Scannapieco FA.** 2012. *Streptococcus mutans* out-competes *Streptococcus gordonii* in vivo. *J Dent Res* **91**:513-519.
3. **Macrina FL, Tobian JA, Jones KR, Evans RP, Clewell DB.** 1981. Molecular cloning in the streptococci. pp. 195-210. *In* A. Hollander, R. DeMoss, S. Kaplan, J. Konisky, D. Savage,

and R. Wolfe (ed.), Genetic engineering of microorganisms for chemicals. Plenum Publishing Corp., New York.

**TABLE S2** Primers used in this study

| Primer name    | Primer sequence (5' to 3')                     | Target and purpose                                                                |
|----------------|------------------------------------------------|-----------------------------------------------------------------------------------|
| Hind3C'abpAF   | ATA <u>AAGCTT</u> CAGAAGCAATAATTCGT<br>ATCCATG | <i>Hind</i> III underlined.<br>Construction of <i>abpA</i><br>complemented strain |
| Hind3C'abpAR   | ATA <u>AAGCTT</u> CTTATTTGGAGCCTTCT<br>TAGTTTG | <i>Hind</i> III underlined.<br>Construction of <i>abpA</i><br>complemented strain |
| pVA749-F       | CTCGCGCTCTAAACGCTCTA                           | Plasmid pVA749                                                                    |
| pVA749-R       | GGCAGTTGAAAGTCAGCACCC                          | Plasmid pVA749                                                                    |
| <i>gyrA</i> -F | GCGGATTGTTGTAACCGAGT                           | <i>gyrA</i> , endogenous control<br>qRT-PCR                                       |
| <i>gyrA</i> -R | ACGGACACCCTCACGATTAG                           | <i>gyrA</i> , endogenous control<br>qRT-PCR                                       |
| <i>srtB</i> -F | GAATGAGCCTTACATGGGGA                           | <i>srtB</i> , qRT-PCR                                                             |
| <i>srtB</i> -R | TACTTCCACGAGCATGACCA                           | <i>srtB</i> , qRT-PCR                                                             |
| SGO_0100-F     | CTGAGGTTTCGCCCTCAACT                           | SGO_0100, qRT-PCR                                                                 |
| SGO_0100-R     | TAACTGCTGACCAGACTGCG                           | SGO_0100, qRT-PCR                                                                 |
| SGO_0101-F     | TTGGCTGCCATTCGTTACCA                           | SGO_0101, qRT-PCR                                                                 |
| SGO_0101-R     | GACTGGCTCCAAAGGTCACA                           | SGO_0101, qRT-PCR                                                                 |
| SGO_0102-F     | ACAGTTGCAGTCGGTCTGAG                           | SGO_0102, qRT-PCR                                                                 |
| SGO_0102-R     | TTATCCCTTGTCACCACCGC                           | SGO_0102, qRT-PCR                                                                 |
| SGO_0103-F     | GTCTCAGCACCTTCCGTTCA                           | SGO_0103, qRT-PCR                                                                 |

|            |                          |                   |
|------------|--------------------------|-------------------|
| SGO_0103-R | TACGCGCCAAGGAAGTAGGA     | SGO_0103, qRT-PCR |
| SGO_0104-F | ACGGAGCACCTGCTGTTATC     | SGO_0104, qRT-PCR |
| SGO_0104-R | CAGTCAGCAAGGAAGGCAGA     | SGO_0104, qRT-PCR |
| SGO_1174-F | CTGCCCAAGCTGGTACTTCA     | SGO_1174, qRT-PCR |
| SGO_1174-R | CCACCAAGGCGAAGAAGAGT     | SGO_1174, qRT-PCR |
| SGO_1175-F | TGGACAAGG TTCAGCCCAAG    | SGO_1175, qRT-PCR |
| SGO_1175-R | TTTATCAGCCAGTTGTGCAT     | SGO_1175, qRT-PCR |
| SGO_1176-F | AGAGCGGGCCTTTTCTAACC     | SGO_1176, qRT-PCR |
| SGO_1176-R | TAGGACGGGTGAACTTGGC      | SGO_1176, qRT-PCR |
| SGO_1177-F | GGGCTTCCTGGTGCTCTATC     | SGO_1177, qRT-PCR |
| SGO_1177-R | AACGTTGGAGACACAACCGA     | SGO_1177, qRT-PCR |
| SGO_1178-F | GCAGCCTGCTCTAATCAAAAA    | SGO_1178, qRT-PCR |
| SGO_1178-R | TCAGACATCATAGAAGAGTCCTTC | SGO_1178, qRT-PCR |
| SGO_1179-F | TCGGATCAGCCGAAAACGAT     | SGO_1179, qRT-PCR |
| SGO_1179-R | ACCAAGGGGCATAGACCACT     | SGO_1179, qRT-PCR |

---

**TABLE S6** Primers used for the gene junction amplification in RT-PCR of the gene clusters SGO\_1173-1180 and SGO\_2103-2106

| Primer name     | Primer sequence (5' to 3') |
|-----------------|----------------------------|
| SGO_1173/1174-F | ACTCTTCTTCGCCTTGGTGG       |
| SGO_1173/1174-R | AATCGAACCGTTCTGGGCTT       |
| SGO_1174/1175-F | CATGCACAACCTGGCTGATCC      |
| SGO_1174/1175-R | CTTGCTCAGTGTGGAGGTGG       |
| SGO_1175/1176-F | GCCAAGTTTCACCCGTCCTA       |
| SGO_1175/1176-R | TTTCTCTGGCTAGCTTGGCT       |
| SGO_1176/1177-F | ATTTTGGGCTTCCTGGTGCT       |
| SGO_1176/1177-R | TACACCCCAGAAACAGCCAC       |
| SGO_1177/1178-F | CGCTACACTTACAATCGCTGG      |
| SGO_1177/1178-R | GATAGAGCACCAGGAAGCCC       |
| SGO_1178/1179-F | GCTCTTCAGGGAGGTTTGCT       |
| SGO_1178/1179-R | TGAATCACTTGACTTCATTTCTGTCT |
| SGO_1179/1180-F | CGTGTGGAAACCTCTCGGAA       |
| SGO_1179/1180-R | AGCACCAGCCCCATATCCTA       |
| SGO_2103/2104-F | TCGGACTAGCTTCGATGGAGA      |
| SGO_2103/2104-R | CCACAGCCTCATACCAGTGA       |
| SGO_2104/2105-F | GTTGAAGGTGGAAGCCACAA       |
| SGO_2104/2105-R | CAGCTGCAACAGCAACAACA       |
| SGO_2105/2106-F | AGCAGGTGCAGTTGATGTGT       |
| SGO_2105/2106-R | GTATGCGCCGTCGTTGTTAC       |
